# Supplementary material for: Phase Separation Mediates NUP98 Fusion Oncoprotein Leukemic Transformation
Source: Cancer Discov. 2021 Dec 13;12(4):1152–69. doi: 10.1158/2159-8290.CD-21-0674 (PMC8983581; doi:10.1158/2159-8290.CD-21-0674)
Supplement: Supplementary Table [file cd-21-0674_table_s1-4_suppst1-st4.xlsx]

## Sheet: Sup_Table_1
	Supplementary Table 1. Compilation of published reports showing cell imaging data indicating that NUP98 FOs form nuclear puncta.
	NUP98 FO name		Localization pattern		C-terminal domain type
	NUP98-DDX10		Nuclear puncta observed		Lacks DNA binding and chromatin binding domains; exhibits coiled-coil and helicase domains. [1,2,3]
	NUP98-HHEX		Nuclear puncta observed		Exhibits a DNA binding homeodomain. [4,5]
	NUP98-HBO1		Nuclear puncta observed		Also known as KAT7; exhibits a DNA binding CCHC-type zinc finger domain and MYST-like histone acetyltransferase domain. [6]
	NUP98-HOXA9		Nuclear puncta observed		Exhibits a DNA binding homeodomain. [1,3,4,5,6,7,8,9,10]
	NUP98-HOXA10		Nuclear puncta observed		Exhibits a DNA binding homeodomain. [5]
	NUP98-HOXC11		Nuclear puncta observed		Exhibits a DNA binding homeodomain. [10]
	NUP98-HOXD13		Nuclear puncta observed		Exhibits a DNA binding homeodomain. [11]
	NUP98-IQCG		Nuclear puncta observed		Lacks DNA binding and chromatin binding domains; exhibits coiled-coil and IQ (calmodulin binding) domains. [12,13]
	NUP98-KDM5A		Nuclear puncta observed		Exhibits a chromatin binding PHD domain. [3,6,14]
	NUP98-LEDGF		Nuclear localization without puncta		Exhibits an integrin-binding domain that mediates chromatin binding via interactions with MLL. [5]
	NUP98-NSD1		Nuclear puncta observed		Exhibits multiple chromatin binding PHD domains. [3,5,15]
	NUP98-NSD3		Nuclear puncta observed		Exhibits multiple chromatin binding PHD domains. [5]
	NUP98-PHF23		Nuclear puncta observed		Exhibits a chromatin binding PHD domain. [14,16]
	NUP98-PRRX1		Nuclear puncta observed		Also known as PMX1; exhibits a DNA binding homeodomain. [5,10]
	NUP98-RARA		Nuclear puncta observed		Exhibits a DNA binding C4-type zinc finger domain. [16]
	NUP98-RARG		Nuclear puncta observed		Exhibits a DNA binding zinc finger domain. [14]
	NUP98-SETBP1		Nuclear puncta observed		Exhibits a chromatin targeting SET domain. [17]
	NUP98-TOP1		Nuclear localization without puncta		Exhibits a DNA topoisomerase domain. [18]
	References
	1	Takeda A. et al. J Biol Chem. 285(21):16248-57. doi: 10.1074/jbc.M109.048785. (2010) PMID: 20233715.
	2	Yassin ER. et al. Effects of the NUP98-DDX10 oncogene on primary human CD34+ cells: role of a conserved helicase motif. Leukemia. 24(5):1001-11. doi: 10.1038/leu.2010.42. (2010) PMID: 20339440.
	3	Terlecki-Zaniewicz S. et al. Biomolecular condensation of NUP98 fusion proteins drives leukemogenic gene expression. Nat Struct Mol Biol. (2):190-201. doi: 10.1038/s41594-020-00550-w. (2021) PMID: 33479542
	4	Jankovic D. et al. Leukemogenic mechanisms and targets of a NUP98/HHEX fusion in acute myeloid leukemia. Blood. 111(12):5672-82. doi: 10.1182/blood-2007-09-108175. (2008) PMID: 18388181.
	5	Fahrenkrog B. et al. Expression of Leukemia-Associated Nup98 Fusion Proteins Generates an Aberrant Nuclear Envelope Phenotype. PLoS One. 11(3):e0152321. doi: 10.1371/journal.pone.0152321. (2016) PMID: 27031510.
	6	Hayashi, Y et al. NUP98-HBO1-fusion generates phenotypically and genetically relevant chronic myelomonocytic leukemia pathogenesis. Blood advances 9;3(7):1047-1060. doi: 10.1182/bloodadvances.2018025007. (2009) PMID: 30944097
	7	Asper LH et al. CREB binding protein interacts with nucleoporin-specific FG repeats that activate transcription and mediate NUP98-HOXA9 oncogenicity. Mol Cell Biol. 19(1):764-76. doi: 10.1128/mcb.19.1.764. (1999) PMID: 9858599
	8	Funasaka. et al. RNA export factor RAE1 contributes to NUP98-HOXA9-mediated leukemogenesis. Cell Cycle.10(9):1456-67. doi: 10.4161/cc.10.9.15494. (2011) PMID: 21467841.
	9	Oka M. et al. Chromatin-prebound Crm1 recruits Nup98-HoxA9 fusion to induce aberrant expression of Hox cluster genes. Elife. 5:e09540. doi: 10.7554/eLife.09540. (2016) PMID: 26740045.
	10	Bai XT. et al. Trans-repressive effect of NUP98-PMX1 on PMX1-regulated c-FOS gene through recruitment of histone deacetylase 1 by FG repeats. Cancer Res. 66(9):4584-90. doi: 10.1158/0008-5472.CAN-05-3101. (2006) PMID: 16651408.
	11	Xu S. et al. Nup98-homeodomain fusions interact with endogenous Nup98 during interphase and localize to kinetochores and chromosome arms during mitosis. Mol Biol Cell. 21(9):1585-96. doi: 10.1091/mbc.e09-07-0561.(2010) PMID: 20237156.
	12	Pan M. et al. Inhibition of the nuclear export of p65 and IQCG in leukemogenesis by NUP98-IQCG. Front Med. 410-419. doi: 10.1007/s11684-016-0489-0. (2016) PMID: 27864780.
	13	Pan Q. et al. A new fusion gene NUP98-IQCG identified in an acute T-lymphoid/myeloid leukemia with a t(3;11)(q29q13;p15)del(3)(q29) translocation. Oncogene. 27(24):3414-23. doi:10.1038/sj.onc.1210999. (2008) PMID: 18084320.
	14	Qiu JJ. et al. Critical role of retinoid/rexinoid signaling in mediating transformation and therapeutic response of NUP98-RARG leukemia. Leukemia. 1153-62. doi: 10.1038/leu.2014.334. (2015) PMID: 25510432.
	15	Hollink IH. et al. NUP98/NSD1 characterizes a novel poor prognostic group in acute myeloid leukemia with a distinct HOX gene expression pattern. Blood. 118(13):3645-56. doi: 10.1182/blood-2011-04-346643. (2011) PMID: 21813447.
	16	Zhu HH. et al. Yang MC, Wang F, Lou YJ, Jin J, Li K, Zhang SZ. Identification of a novel NUP98-RARA fusion transcript as the 14th variant of acute promyelocytic leukemia. Am J Hematol. 95(7):E184-E186. doi: 10.1002/ajh.25807. (2020) PMID: 32242976.
	17	Saito S. et al. Yokokawa T, Iizuka G, Cigdem S, Okuwaki M, Nagata K. Function of Nup98 subtypes and their fusion proteins, Nup98-TopIIβ and Nup98-SETBP1 in nuclear-cytoplasmic transport. Biochem Biophys Res Commun. 487(1):96-102. doi: 10.1016/j.bbrc.2017.04.024. (2017) PMID: 28392395.
	18	Gurevich RM. et al. NUP98-topoisomerase I acute myeloid leukemia-associated fusion gene has potent leukemogenic activities independent of an engineered catalytic site mutation. Blood. (4):1127-36. doi: 10.1182/blood-2003-10-3550. (2004) PMID: 15100157.

## Sheet: Sup_Table_2
Supplementary Table 2. Average values of puncta features for NUP98 FO constructs. Average values and standard error of the mean of features of puncta formed in HEK293T cells by NHA9 and mutant NHA9 constructs, mHSPCs by NHA9 and mutant NHA9 constructs, and in HEK293T cells by the additional NUP98 FO constructs.
Construct	Cell type	Relevant figure(s) in manuscript	Ave Puncta # (/103 um3)	Ave Vp (μm3)	Ave [LP]	Ave [DP]	Ave Kp	Ave ΔGTr (kcal/mol)
G-NHA9	HEK293T	Fig. 1-3	72.08 ± 4.16	0.13 ± 0	1.13 ± 0.05	13.17 ± 0.11	12.23 ± 1.06	-1.16 ± 0.03
G-NHA9-ΔDNA	HEK293T	Fig. 2, Suppl. Fig. 2	11.15 ± 0.9	0.43 ± 0.02	0.75 ± 0.06	24.92 ± 1.05	29.85 ± 4.64	-1.73 ± 0.03
G-NUP98-N	HEK293T	Suppl. Fig. 2	7.45 ± 0.5	0.68 ± 0.02	1.1 ± 0.06	65.25 ± 1.74	33.86 ± 1.55	-2.07 ± 0.02
G-NHA9-8FA	HEK293T	Fig. 3	60.61 ± 4.26	0.22 ± 0.01	1.54 ± 0.08	16.01 ± 0.2	10.97 ± 1.74	-1.05 ± 0.03
G-NHA9-21FGAA	HEK293T	Fig. 3	3.9 ± 0.57	8.88 ± 1.4	5.53 ± 0.22	37.83 ± 0.56	3.54 ± 0.64	-0.59 ± 0.02
G-NHA9Midi	HEK293T	Suppl. Fig. 3	11.2 ± 1.67	0.54 ± 0.07	1.54 ± 0.11	20.67 ± 0.52	7.68 ± 1.95	-0.8 ± 0.04
G-NHA9Midi-21FGAA	HEK293T	Suppl. Fig. 3	0.37 ± 0.35	19.38 ± 12.53	6.75 ± 0.47	61.67 ± 15.2	1.46 ± 0.19	-0.21 ± 0.08
G-NHA9	HSPCs	Suppl. Fig. 5	17.15 ± 1.91	0.04 ± 0	0.2 ± 0.01	4.25 ± 0.05	15.29 ± 0.67	-1.63 ± 0.02
G-NHA9-ΔDNA	HSPCs	Suppl. Fig. 5	5.41 ± 0.45	0.34 ± 0.02	0.19 ± 0.01	11.43 ± 0.52	38.84 ± 1.48	-2.19 ± 0.02
G-NHA9-8FA	HSPCs	Suppl. Fig. 5	1.25 ± 0.63	0.1 ± 0.03	0.25 ± 0.01	5.1 ± 0.31	7.18 ± 1.31	-1.14 ± 0.08
G-NHA9-21FGAA	HSPCs	Suppl. Fig. 5	0.09 ± 0.05	0.05 ± 0.02	0.23 ± 0.01	3.96 ± 0.32	4.45 ± 0.15	-0.92 ± 0.02
G-NHA9Midi	HSPCs	Suppl. Fig. 5	1.6 ± 0.34	0.07 ± 0.01	0.43 ± 0.01	4.04 ± 0.08	4.4 ± 0.19	-0.88 ± 0.03
G-NHA9Midi-21FGAA	HSPCs	Suppl. Fig. 5	3.33 ± 0.75	0.12 ± 0.01	0.53 ± 0.03	5.21 ± 0.16	3.8 ± 0.3	-0.78 ± 0.03
G-NHA9	HEK293T	Suppl. Fig. 7	52.63 ± 3.65	0.11 ± 0	0.9 ± 0.04	12.34 ± 0.11	11.79 ± 0.95	-1.21 ± 0.03
G-NUP98-PMX1	HEK293T	Suppl. Fig. 7	106.24 ± 5.59	0.12 ± 0	1.34 ± 0.06	13.21 ± 0.15	11.68 ± 1.03	-1.14 ± 0.03
G-NUP98-KDM5A	HEK293T	Suppl. Fig. 7	15.38 ± 1.8	0.3 ± 0.02	1.53 ± 0.07	16.85 ± 0.18	7.09 ± 0.67	-0.98 ± 0.03
G-NUP98-LNP1	HEK293T	Suppl. Fig. 7	33.96 ± 2.01	0.21 ± 0.01	0.78 ± 0.04	19.01 ± 0.36	24.84 ± 3.38	-1.64 ± 0.03

## Sheet: Sup_Table_3_Upregulated_genes
Supplementary Table 3. Gene set enrichment analysis for up-regulated genes. Complete list of gene sets up-regulated in lin- HSPCs expressing G-NHA9, G-NHA9-8FA, or G-NHA9Midi versus empty vector after one week of growth in methylcellulose containing myeloid and erythroid growth factors. See also Figure 6D.
Pathway	FDR for upregulated genes in G-NHA9	FDR for upregulated genes in G-NHA9-8FA	FDR for upregulated genes in G-NHA9Midi
REACTOME_RESPONSE_OF_EIF2AK4_GCN2_TO_AMINO_ACID_DEFICIENCY	0.351396	0	0.00630527
ROSS_LEUKEMIA_WITH_MLL_FUSIONS	0.0307532	0.359244	0.439266
LI_WILMS_TUMOR_VS_FETAL_KIDNEY_1_DN	0	0.528814	0.374533
PUJANA_BRCA2_PCC_NETWORK	0.0061509	0.68253	0.44786
REACTOME_SIGNALING_BY_ROBO_RECEPTORS	0.29525	0.0255793	0.0545478
REACTOME_RRNA_MODIFICATION_IN_THE_NUCLEUS_AND_CYTOSOL	0.0456639	0.207738	0.0251864
TAKEDA_TARGETS_OF_NUP98_HOXA9_FUSION_16D_UP	0.0334362	0.368032	0.351547
GRAHAM_NORMAL_QUIESCENT_VS_NORMAL_DIVIDING_DN	0.0271908	0.603765	0.479566
BURTON_ADIPOGENESIS_3	0.00430426	0.305185	0.220254
WP_CYTOPLASMIC_RIBOSOMAL_PROTEINS	0.227893	0	0.020236
REACTOME_REGULATION_OF_EXPRESSION_OF_SLITS_AND_ROBOS	0.267042	0.000603	0.0293203
RADMACHER_AML_PROGNOSIS	0.0311397	0.54136	0.446512
KIM_ALL_DISORDERS_CALB1_CORR_DN	0.0308418	0.374915	0.528178
KEGG_DNA_REPLICATION	0.0461336	0.376456	0.171111
REACTOME_SELENOAMINO_ACID_METABOLISM	0.629241	0	0.00524446
REN_BOUND_BY_E2F	0.0265307	0.485359	0.17441
KOBAYASHI_EGFR_SIGNALING_24HR_DN	0.00194624	0.703731	0.480914
SIG_REGULATION_OF_THE_ACTIN_CYTOSKELETON_BY_RHO_GTPASES	0.00590487	0.0436266	0.0248782
JISON_SICKLE_CELL_DISEASE_DN	0.0516863	0.0107235	0.00213682
SOTIRIOU_BREAST_CANCER_GRADE_1_VS_3_UP	0	0.31973	0.149732
MARKEY_RB1_ACUTE_LOF_UP	0.0310674	0.705194	0.54928
IVANOVA_HEMATOPOIESIS_STEM_CELL_AND_PROGENITOR	0.0327682	0.373447	0.254232
TAKEDA_TARGETS_OF_NUP98_HOXA9_FUSION_6HR_UP	0	0.0657302	0.154433
KANG_DOXORUBICIN_RESISTANCE_UP	0.0260836	0.397762	0.525297
DUTERTRE_ESTRADIOL_RESPONSE_24HR_UP	0.000472	0.44733	0.308291
PYEON_HPV_POSITIVE_TUMORS_UP	0.0447085	0.60472	0.457722
SHEDDEN_LUNG_CANCER_POOR_SURVIVAL_A6	0.00858359	0.393665	0.206817
MORI_EMU_MYC_LYMPHOMA_BY_ONSET_TIME_UP	0.0344035	0.45158	0.251441
REACTOME_INFLUENZA_INFECTION	0.0528706	0	0.00416044
KONG_E2F3_TARGETS	0.0038614	0.374276	0.323259
REACTOME_HOMOLOGY_DIRECTED_REPAIR	0.0156282	0.377319	0.139969
KAUFFMANN_DNA_REPLICATION_GENES	0.0345493	0.752984	0.50336
REACTOME_TELOMERE_MAINTENANCE	0.0260286	0.305943	0.119761
DANG_MYC_TARGETS_UP	0.0154332	0.0374707	0.0245096
VALK_AML_WITH_FLT3_ITD	0.00369428	0.1599	0.197886
TAVOR_CEBPA_TARGETS_DN	0.0408717	0.371881	0.147341
BERENJENO_TRANSFORMED_BY_RHOA_UP	0.00369189	0.375603	0.161007
REACTOME_ACTIVATION_OF_ATR_IN_RESPONSE_TO_REPLICATION_STRESS	0.0198943	0.381404	0.15938
FEVR_CTNNB1_TARGETS_DN	0.0349775	0.61013	0.199499
KEGG_RIBOSOME	0.106047	0	0.00195153
GARGALOVIC_RESPONSE_TO_OXIDIZED_PHOSPHOLIPIDS_GREEN_UP	0.0254639	0.29237	0.555686
IVANOVA_HEMATOPOIESIS_EARLY_PROGENITOR	0.04521	0.371522	0.152986
REACTOME_NONSENSE_MEDIATED_DECAY_NMD	0.193108	0	0.00845851
REACTOME_SNRNP_ASSEMBLY	0.0348516	0.287821	0.0550131
CARD_MIR302A_TARGETS	0.0495269	0.210636	0.117233
FOURNIER_ACINAR_DEVELOPMENT_LATE_2	0.0294081	0.414252	0.186708
PUJANA_BRCA_CENTERED_NETWORK	0.00410861	0.319097	0.124903
ROSTY_CERVICAL_CANCER_PROLIFERATION_CLUSTER	0	0.715136	0.556984
DELPUECH_FOXO3_TARGETS_DN	0.0663045	0.0381281	0.0738136
KEGG_SYSTEMIC_LUPUS_ERYTHEMATOSUS	0.0261155	0.0618	0.134364
REACTOME_EUKARYOTIC_TRANSLATION_INITIATION	0.0813779	0	0.00347838
WP_DNA_REPLICATION	0.0257679	0.358852	0.158676
MISSIAGLIA_REGULATED_BY_METHYLATION_DN	0.0258076	0.508568	0.247765
REACTOME_TRANSPORT_OF_MATURE_TRANSCRIPT_TO_CYTOPLASM	0.0346868	0.319097	0.0527649
REACTOME_HOMOLOGOUS_DNA_PAIRING_AND_STRAND_EXCHANGE	0.029187	0.367583	0.157087
REACTOME_HDR_THROUGH_HOMOLOGOUS_RECOMBINATION_HRR	0.0352586	0.324481	0.149561
REACTOME_CELL_CYCLE_CHECKPOINTS	0.006713	0.369233	0.146366
MIKKELSEN_MCV6_ICP_WITH_H3K27ME3	0.0450944	0.658505	0.886366
WANG_IMMORTALIZED_BY_HOXA9_AND_MEIS1_DN	0.0152742	0.553925	0.656223
ISHIDA_E2F_TARGETS	0.0308624	0.450221	0.378858
BENPORATH_ES_1	0.0256802	0.502718	0.275185
TAKEDA_TARGETS_OF_NUP98_HOXA9_FUSION_10D_UP	0.0264305	0.37655	0.4314
WP_DNA_REPAIR_PATHWAYS_FULL_NETWORK	0.0459341	0.452145	0.157058
HOFFMANN_LARGE_TO_SMALL_PRE_BII_LYMPHOCYTE_UP	0.00615936	0.916828	0.734058
KAUFFMANN_MELANOMA_RELAPSE_UP	0.0212262	0.360615	0.156882
ZHOU_CELL_CYCLE_GENES_IN_IR_RESPONSE_6HR	0.0349195	0.734948	0.417241
VERNELL_RETINOBLASTOMA_PATHWAY_UP	0.0150842	0.595035	0.366488
TAKEDA_TARGETS_OF_NUP98_HOXA9_FUSION_3D_UP	0.0203516	0.327457	0.481981
ZHOU_CELL_CYCLE_GENES_IN_IR_RESPONSE_24HR	0.0263567	0.786257	0.548213
SANSOM_APC_TARGETS_REQUIRE_MYC	0.0333688	0.452521	0.152845
REACTOME_DNA_REPAIR	0.0109585	0.556128	0.151623
REACTOME_DNA_DOUBLE_STRAND_BREAK_REPAIR	0.00362258	0.486419	0.163214
FLORIO_NEOCORTEX_BASAL_RADIAL_GLIA_DN	0.0336093	0.737402	0.924846
KAUFFMANN_DNA_REPAIR_GENES	0.0298506	0.405336	0.157265
REACTOME_RESOLUTION_OF_SISTER_CHROMATID_COHESION	0.0412244	0.870147	0.566599
MULLIGHAN_NPM1_MUTATED_SIGNATURE_1_UP	0.00636827	0.254761	0.432877
REACTOME_RRNA_PROCESSING	0.00346114	0	0
MULLIGHAN_NPM1_SIGNATURE_3_UP	0.0409481	0.3374	0.607367
GARCIA_TARGETS_OF_FLI1_AND_DAX1_DN	0.0453585	0.768094	0.303941
PUJANA_XPRSS_INT_NETWORK	0.00163486	0.368719	0.132997
BILANGES_SERUM_AND_RAPAMYCIN_SENSITIVE_GENES	0.238355	0.00147283	0.00814827
HESS_TARGETS_OF_HOXA9_AND_MEIS1_UP	0	0.000959	0.00192109
LEE_CALORIE_RESTRICTION_NEOCORTEX_UP	0.0459732	0.322118	0.530939
REACTOME_PROCESSING_OF_DNA_DOUBLE_STRAND_BREAK_ENDS	0.0295498	0.313836	0.158709
WINNEPENNINCKX_MELANOMA_METASTASIS_UP	0.008477	0.431456	0.152886
GOBERT_OLIGODENDROCYTE_DIFFERENTIATION_UP	0.0015091	0.620549	0.526209
ALCALAY_AML_BY_NPM1_LOCALIZATION_UP	0.0130726	0.307381	0.597547
MULLIGHAN_NPM1_MUTATED_SIGNATURE_2_UP	0.00147623	0.25395	0.346305
REACTOME_DNA_STRAND_ELONGATION	0.0309985	0.372542	0.182805
MUELLER_PLURINET	0	0.32601	0.114124
MANALO_HYPOXIA_DN	0	0.32798	0.00503795
REACTOME_ACTIVATION_OF_ANTERIOR_HOX_GENES_IN_HINDBRAIN_DEVELOPMENT_DURING_EARLY_EMBRYOGENESIS	0.0491208	0.103768	0.311096
REACTOME_EUKARYOTIC_TRANSLATION_ELONGATION	0.0932195	0	0.00258623
REACTOME_DNA_REPLICATION	0.0350291	0.470068	0.166507
TAKEDA_TARGETS_OF_NUP98_HOXA9_FUSION_8D_UP	0	0.30775	0.298276
REACTOME_EXTENSION_OF_TELOMERES	0.0257877	0.285057	0.113347
REACTOME_SRP_DEPENDENT_COTRANSLATIONAL_PROTEIN_TARGETING_TO_MEMBRANE	0.105782	0	0.000534
REACTOME_CHROMOSOME_MAINTENANCE	0.00638473	0.266566	0.117569
REACTOME_ACTIVATION_OF_THE_MRNA_UPON_BINDING_OF_THE_CAP_BINDING_COMPLEX_AND_EIFS_AND_SUBSEQUENT_BINDING_TO_43S	0.117783	0.00413531	0.0257966
WANG_RESPONSE_TO_GSK3_INHIBITOR_SB216763_DN	0.00367756	0.373997	0.170839
IRITANI_MAD1_TARGETS_DN	0.0166234	0.210407	0.0271703
CROONQUIST_IL6_DEPRIVATION_DN	0.0170077	0.41829	0.467496
JAATINEN_HEMATOPOIETIC_STEM_CELL_UP	0.0263592	0.378643	0.480852
REACTOME_MITOTIC_SPINDLE_CHECKPOINT	0.0295131	0.370466	0.155212
REACTOME_ACTIVATION_OF_THE_PRE_REPLICATIVE_COMPLEX	0.0347493	0.392428	0.15674
BLANCO_MELO_BRONCHIAL_EPITHELIAL_CELLS_INFLUENZA_A_DEL_NS1_INFECTION_DN	0.000511	0.667976	0.540616
FAELT_B_CLL_WITH_VH_REARRANGEMENTS_DN	0.0253873	0.0250851	0.0782857
REACTOME_TRNA_PROCESSING	0.0159391	0.258431	0.00395502
WONG_EMBRYONIC_STEM_CELL_CORE	0.00659092	0.312497	0.0764416
PID_MYC_ACTIV_PATHWAY	0.0262482	0.370904	0.175092
PUJANA_BREAST_CANCER_WITH_BRCA1_MUTATED_UP	0.0267274	0.503274	0.200263
REACTOME_TRANSLATION	0.0351906	0.000284	0.000356

## Sheet: Sup_Table_3_Downgulated_genes
Supplementary Table 3. Gene set enrichment analysis for down-regulated genes. Complete list of gene sets down-regulated in lin- HSPCs expressing G-NHA9, G-NHA9-8FA, or G-NHA9Midi versus empty vector after one week of growth in methylcellulose containing myeloid and erythroid growth factors. See also Figure 6D.
Pathway	FDR for downregulated genes in G-NHA9	FDR for downregulated genes in G-NHA9-8FA	FDR for downregulated genes in G-NHA9Midi
KEGG_LYSOSOME	0.0161066	0.171915	0.0780571
VERHAAK_GLIOBLASTOMA_MESENCHYMAL	0.0169322	0.293458	0.0741958
CHYLA_CBFA2T3_TARGETS_DN	0.212518	0.000978	0.00674519
SARRIO_EPITHELIAL_MESENCHYMAL_TRANSITION_DN	0.0220809	0.152992	0.0755221
REACTOME_AQUAPORIN_MEDIATED_TRANSPORT	0.0317472	0.295448	0.139045
JOHNSTONE_PARVB_TARGETS_3_UP	0.00862909	0.232874	0.101357
REACTOME_METABOLISM_OF_PORPHYRINS	0.0312279	0.340515	0.153447
REACTOME_DAG_AND_IP3_SIGNALING	0.0128549	0.172256	0.0795029
REACTOME_GABA_B_RECEPTOR_ACTIVATION	0.048483	0.232473	0.145258
KEGG_SNARE_INTERACTIONS_IN_VESICULAR_TRANSPORT	0.0458094	0.847867	0.506643
REACTOME_VASOPRESSIN_REGULATES_RENAL_WATER_HOMEOSTASIS_VIA_AQUAPORINS	0.0212409	0.259492	0.120397
KEGG_GNRH_SIGNALING_PATHWAY	0.0172782	0.162053	0.0974239
REACTOME_BIOLOGICAL_OXIDATIONS	0.0289146	0.399783	0.339238
REACTOME_G_PROTEIN_MEDIATED_EVENTS	0.00275543	0.0565482	0.0646506
WP_SENESCENCE_AND_AUTOPHAGY_IN_CANCER	0.0213255	0.694455	0.362454
PID_ENDOTHELIN_PATHWAY	0.0424303	0.163877	0.0710724
REACTOME_IRON_UPTAKE_AND_TRANSPORT	0.0174232	0.274027	0.130368
WAKABAYASHI_ADIPOGENESIS_PPARG_RXRA_BOUND_WITH_H4K20ME1_MARK	0.0417248	0.432052	0.197758
REACTOME_CA_DEPENDENT_EVENTS	0.0149442	0.160346	0.100991
LI_PROSTATE_CANCER_EPIGENETIC	0.0175449	0.233404	0.0975716
PID_ECADHERIN_STABILIZATION_PATHWAY	0.0336952	0.189937	0.232247
KEGG_EPITHELIAL_CELL_SIGNALING_IN_HELICOBACTER_PYLORI_INFECTION	0.0246693	0.309661	0.240099
KEGG_GAP_JUNCTION	0.169016	0.00780023	0.0631486
PID_ALK1_PATHWAY	0.0174685	0.226221	0.170146
HESS_TARGETS_OF_HOXA9_AND_MEIS1_DN	0	0.26159	0.0820675
BROWN_MYELOID_CELL_DEVELOPMENT_UP	0.0138669	0.669154	0.22743
REACTOME_OPIOID_SIGNALLING	0.00178545	0.172395	0.0994964

## Sheet: Sup_Table_4
Supplementary Table 4. Compilation of published reports showing cell imaging data indicating that NUP98 FOs form nuclear puncta.
Plasmid Name	Tag	Experiments in which plasmid was used	Transgene sequence	Antibiotic Resistance
CL20_EGFP	EGFP	Imaging in HEK293T; transient transfections	MVSKGEELFTGVVPILVELDGDVNGHKFSVSGEGEGDATYGKLTLKFICTTGKLPVPWPTLVTTLTYGVQCFSRYPDHMKQHDFFKSAMPEGYVQERTIFFKDDGNYKTRAEVKFEGDTLVNRIELKGIDFKEDGNILGHKLEYNYNSHNVYIMADKQKNGIKVNFKIRHNIEDGSVQLADHYQQNTPIGDGPVLLPDNHYLSTQSALSKDPNEKRDHMVLLEFVTAAGITLGMDELYK-	Ampicillin
CL20_mEGFP-NUP98-HOXA9	mEGFP	Imaging in HEK293T; transient transfections	MVSKGEELFTGVVPILVELDGDVNGHKFSVSGEGEGDATYGKLTLKFICTTGKLPVPWPTLVTTLTYGVQCFSRYPDHMKQHDFFKSAMPEGYVQERTIFFKDDGNYKTRAEVKFEGDTLVNRIELKGIDFKEDGNILGHKLEYNYNSHNVYIMADKQKNGIKVNFKIRHNIEDGSVQLADHYQQNTPIGDGPVLLPDNHYLSTQSKLSKDPNEKRDHMVLLEFVTAAGITLGMDELYKGGSGGSGGSAAAMFNKSFGTPFGGGTGGFGTTSTFGQNTGFGTTSGGAFGTSAFGSSNNTGGLFGNSQTKPGGLFGTSSFSQPATSTSTGFGFGTSTGTANTLFGTASTGTSLFSSQNNAFAQNKPTGFGNFGTSTSSGGLFGTTNTTSNPFGSTSGSLF…	Ampicillin
CL20_mEGFP-NUP98-HOXA9-8FA	mEGFP	Imaging in HEK293T; transient transfections	MVSKGEELFTGVVPILVELDGDVNGHKFSVSGEGEGDATYGKLTLKFICTTGKLPVPWPTLVTTLTYGVQCFSRYPDHMKQHDFFKSAMPEGYVQERTIFFKDDGNYKTRAEVKFEGDTLVNRIELKGIDFKEDGNILGHKLEYNYNSHNVYIMADKQKNGIKVNFKIRHNIEDGSVQLADHYQQNTPIGDGPVLLPDNHYLSTQSKLSKDPNEKRDHMVLLEFVTAAGITLGMDELYKGGSGGSGGSAAAMFNKSFGTPFGGGTGGFGTTSTFGQNTGFGTTSGGAFGTSAFGSSNNTGGLFGNSQTKPGGLFGTSSFSQPATSTSTGFGFGTSTGTANTLFGTASTGTSLFSSQNNAFAQNKPTGFGNFGTSTSSGGLFGTTNTTSNPFGSTSGSLF…	Ampicillin
CL20_mEGFP-NUP98-HOXA9-21FGAA	mEGFP	Imaging in HEK293T; transient transfections	MVSKGEELFTGVVPILVELDGDVNGHKFSVSGEGEGDATYGKLTLKFICTTGKLPVPWPTLVTTLTYGVQCFSRYPDHMKQHDFFKSAMPEGYVQERTIFFKDDGNYKTRAEVKFEGDTLVNRIELKGIDFKEDGNILGHKLEYNYNSHNVYIMADKQKNGIKVNFKIRHNIEDGSVQLADHYQQNTPIGDGPVLLPDNHYLSTQSKLSKDPNEKRDHMVLLEFVTAAGITLGMDELYKGGSGGSGGSAAAMFNKSFGTPFGGGTGGFGTTSTFGQNTGFGTTSGGAFGTSAFGSSNNTGGLFGNSQTKPGGLFGTSSFSQPATSTSTGFGFGTSTGTANTLFGTASTGTSLFSSQNNAFAQNKPTGFGNFGTSTSSGGLFGTTNTTSNPFGSTSGSLF…	Ampicillin
CL20_mEGFP-NUP98-HOXA9-∆DNA	mEGFP	Imaging in HEK293T; transient transfections	MVSKGEELFTGVVPILVELDGDVNGHKFSVSGEGEGDATYGKLTLKFICTTGKLPVPWPTLVTTLTYGVQCFSRYPDHMKQHDFFKSAMPEGYVQERTIFFKDDGNYKTRAEVKFEGDTLVNRIELKGIDFKEDGNILGHKLEYNYNSHNVYIMADKQKNGIKVNFKIRHNIEDGSVQLADHYQQNTPIGDGPVLLPDNHYLSTQSKLSKDPNEKRDHMVLLEFVTAAGITLGMDELYKGGSGGSGGSAAAMFNKSFGTPFGGGTGGFGTTSTFGQNTGFGTTSGGAFGTSAFGSSNNTGGLFGNSQTKPGGLFGTSSFSQPATSTSTGFGFGTSTGTANTLFGTASTGTSLFSSQNNAFAQNKPTGFGNFGTSTSSGGLFGTTNTTSNPFGSTSGSLF…	Ampicillin
CL20_mEGFP-MIDI	mEGFP	Imaging in HEK293T; transient transfections	MVSKGEELFTGVVPILVELDGDVNGHKFSVSGEGEGDATYGKLTLKFICTTGKLPVPWPTLVTTLTYGVQCFSRYPDHMKQHDFFKSAMPEGYVQERTIFFKDDGNYKTRAEVKFEGDTLVNRIELKGIDFKEDGNILGHKLEYNYNSHNVYIMADKQKNGIKVNFKIRHNIEDGSVQLADHYQQNTPIGDGPVLLPDNHYLSTQSKLSKDPNEKRDHMVLLEFVTAAGITLGMDELYKGGSGGSGGSAAAGLFGSSPATSSATGLFSSSTTNSGFAYGQNKTAFGTSTTGFGTNPGGLFGQQNQQTTSLFSKPFGQATTTQNTGFSFGNTSTIGQPSTNTMGLFGVTQASQPGGLFGTATNTSTGTAFGTGTGLFGQTNTGFGAVGSTLFGNNKLTTF…	Ampicillin
CL20_mEGFP-MIDI-21FGAA	mEGFP	Imaging in HEK293T; transient transfections	MVSKGEELFTGVVPILVELDGDVNGHKFSVSGEGEGDATYGKLTLKFICTTGKLPVPWPTLVTTLTYGVQCFSRYPDHMKQHDFFKSAMPEGYVQERTIFFKDDGNYKTRAEVKFEGDTLVNRIELKGIDFKEDGNILGHKLEYNYNSHNVYIMADKQKNGIKVNFKIRHNIEDGSVQLADHYQQNTPIGDGPVLLPDNHYLSTQSKLSKDPNEKRDHMVLLEFVTAAGITLGMDELYKGGSGGSGGSAAAGLAASSPATSSATGLFSSSTTNSGFAYGQNKTAAATSTTGAATNPGGLAAQQNQQTTSLFSKPAAQATTTQNTGFSAANTSTIGQPSTNTMGLAAVTQASQPGGLAATATNTSTGTAAATGTGLAAQTNTGAAAVGSTLAANNKLTTA…	Ampicillin
CL20_mEGFP-NUP98-N	mEGFP	Imaging in HEK293T; transient transfections	MFNKSFGTPFGGGTGGFGTTSTFGQNTGFGTTSGGAFGTSAFGSSNNTGGLFGNSQTKPGGLFGTSSFSQPATSTSTGFGFGTSTGTANTLFGTASTGTSLFSSQNNAFAQNKPTGFGNFGTSTSSGGLFGTTNTTSNPFGSTSGSLFGPSSFTAAPTGTTIKFNPPTGTDTMVKAGVSTNISTKHQCITAMKEYESKSLEELRLEDYQANRKGPQNQVGAGTTTGLFGSSPATSSATGLFSSSTTNSGFAYGQNKTAFGTSTTGFGTNPGGLFGQQNQQTTSLFSKPFGQATTTQNTGFSFGNTSTIGQPSTNTMGLFGVTQASQPGGLFGTATNTSTGTAFGTGTGLFGQTNTGFGAVGSTLFGNNKLTTFGSSTTSAPSFGTTSGGLFGFGTNTSG…	Ampicillin
CL20 mEGFP-NUP98-KDM5A	mEGFP	Imaging in HEK293T; transient transfections	MFNKSFGTPFGGGTGGFGTTSTFGQNTGFGTTSGGAFGTSAFGSSNNTGGLFGNSQTKPGGLFGTSSFSQPATSTSTGFGFGTSTGTANTLFGTASTGTSLFSSQNNAFAQNKPTGFGNFGTSTSSGGLFGTTNTTSNPFGSTSGSLFGPSSFTAAPTGTTIKFNPPTGTDTMVKAGVSTNISTKHQCITAMKEYESKSLEELRLEDYQANRKGPQNQVGAGTTTGLFGSSPATSSATGLFSSSTTNSGFAYGQNKTAFGTSTTGFGTNPGGLFGQQNQQTTSLFSKPFGQATTTQNTGFSFGNTSTIGQPSTNTMGLFGVTQASQPGGLFGTATNTSTGTAFGTGTGLFGQTNTGFGAVGSTLFGNNKLTTFGSSTTSAPSFGTTSGGLFGFGTNTSG…	Ampicillin
CL20 mEGFP-NUP98-LNP1	mEGFP	Imaging in HEK293T; transient transfections	MFNKSFGTPFGGGTGGFGTTSTFGQNTGFGTTSGGAFGTSAFGSSNNTGGLFGNSQTKPGGLFGTSSFSQPATSTSTGFGFGTSTGTANTLFGTASTGTSLFSSQNNAFAQNKPTGFGNFGTSTSSGGLFGTTNTTSNPFGSTSGSLFGPSSFTAAPTGTTIKFNPPTGTDTMVKAGVSTNISTKHQCITAMKEYESKSLEELRLEDYQANRKGPQNQVGAGTTTGLFGSSPATSSATGLFSSSTTNSGFAYGQNKTAFGTSTTGFGTNPGGLFGQQNQQTTSLFSKPFGQATTTQNTGFSFGNTSTIGQPSTNTMGLFGVTQASQPGGLFGTATNTSTGTAFGTGTGLFGQTNTGFGAVGSTLFGNNKLTTFGSSTTSAPSFGTTSGGLFGFGTNTSG…	Ampicillin
CL20 mEGFP-NUP98-PMX1	mEGFP	Imaging in HEK293T; transient transfections	MFNKSFGTPFGGGTGGFGTTSTFGQNTGFGTTSGGAFGTSAFGSSNNTGGLFGNSQTKPGGLFGTSSFSQPATSTSTGFGFGTSTGTANTLFGTASTGTSLFSSQNNAFAQNKPTGFGNFGTSTSSGGLFGTTNTTSNPFGSTSGSLFGPSSFTAAPTGTTIKFNPPTGTDTMVKAGVSTNISTKHQCITAMKEYESKSLEELRLEDYQANRKGPQNQVGAGTTTGLFGSSPATSSATGLFSSSTTNSGFAYGTTGFGTNPGGLFGQQNQQTTSLFSKPFGQATTTQNTGFSFGNTSTIGQPSTNTMGLFGVTQASQPGGLFGTATNTSTGTAFGTGTGLFGQTNTGFGAVGSTLFGNNKLTTFGSSTTSAPSFGTTNGGLFGFGTNTSGNSIFGSKPA…	Ampicillin
pET28_12xHis-TEV-NUP98-HOXA9	12XHis-TEV	in vitro turbidity and imaging; bacterial expression	MGSSHHHHHHHHHHHHSSGQDLENLYFQGSMFNKSFGTPFGGGTGGFGTTSTFGQNTGFGTTSGGAFGTSAFGSSNNTGGLFGNSQTKPGGLFGTSSFSQPATSTSTGFGFGTSTGTANTLFGTASTGTSLFSSQNNAFAQNKPTGFGNFGTSTSSGGLFGTTNTTSNPFGSTSGSLFGPSSFTAAPTGTTIKFNPPTGTDTMVKAGVSTNISTKHQCITAMKEYESKSLEELRLEDYQANRKGPQNQVGAGTTTGLFGSSPATSSATGLFSSSTTNSGFAYGQNKTAFGTSTTGFGTNPGGLFGQQNQQTTSLFSKPFGQATTTQNTGFSFGNTSTIGQPSTNTMGLFGVTQASQPGGLFGTATNTSTGTAFGTGTGLFGQTNTGFGAVGSTLFGNNK…	Kanamycin
pET28_12xHis-TEV-NUP98-HOXA9-8FA	12XHis-TEV	in vitro turbidity and imaging; bacterial expression	MGSSHHHHHHHHHHHHSSGQDLENLYFQGSMFNKSFGTPFGGGTGGFGTTSTFGQNTGFGTTSGGAFGTSAFGSSNNTGGLFGNSQTKPGGLFGTSSFSQPATSTSTGFGFGTSTGTANTLFGTASTGTSLFSSQNNAFAQNKPTGFGNFGTSTSSGGLFGTTNTTSNPFGSTSGSLFGPSSFTAAPTGTTIKFNPPTGTDTMVKAGVSTNISTKHQCITAMKEYESKSLEELRLEDYQANRKGPQNQVGAGTTTGLAGSSPATSSATGLFSSSTTNSGFAYGQNKTAFGTSTTGFGTNPGGLAGQQNQQTTSLFSKPFGQATTTQNTGFSFGNTSTIGQPSTNTMGLAGVTQASQPGGLAGTATNTSTGTAFGTGTGLAGQTNTGFGAVGSTLFGNNK…	Kanamycin
pET28_12xHis-TEV-NUP98-HOXA9-21FGAA	12XHis-TEV	in vitro turbidity and imaging; bacterial expression	MGSSHHHHHHHHHHHHSSGQDLENLYFQGSMFNKSFGTPFGGGTGGFGTTSTFGQNTGFGTTSGGAFGTSAFGSSNNTGGLFGNSQTKPGGLFGTSSFSQPATSTSTGFGFGTSTGTANTLFGTASTGTSLFSSQNNAFAQNKPTGFGNFGTSTSSGGLFGTTNTTSNPFGSTSGSLFGPSSFTAAPTGTTIKFNPPTGTDTMVKAGVSTNISTKHQCITAMKEYESKSLEELRLEDYQANRKGPQNQVGAGTTTGLAASSPATSSATGLFSSSTTNSGFAYGQNKTAAATSTTGAATNPGGLAAQQNQQTTSLFSKPAAQATTTQNTGFSAANTSTIGQPSTNTMGLAAVTQASQPGGLAATATNTSTGTAAATGTGLAAQTNTGAAAVGSTLAANNK…	Kanamycin
pET28_12xHis-TEV-NUP98-HOXA9-∆DNA	12XHis-TEV	in vitro turbidity and imaging; bacterial expression	MGSSHHHHHHHHHHHHSSGQDLENLYFQGSMFNKSFGTPFGGGTGGFGTTSTFGQNTGFGTTSGGAFGTSAFGSSNNTGGLFGNSQTKPGGLFGTSSFSQPATSTSTGFGFGTSTGTANTLFGTASTGTSLFSSQNNAFAQNKPTGFGNFGTSTSSGGLFGTTNTTSNPFGSTSGSLFGPSSFTAAPTGTTIKFNPPTGTDTMVKAGVSTNISTKHQCITAMKEYESKSLEELRLEDYQANRKGPQNQVGAGTTTGLFGSSPATSSATGLFSSSTTNSGFAYGQNKTAFGTSTTGFGTNPGGLFGQQNQQTTSLFSKPFGQATTTQNTGFSFGNTSTIGQPSTNTMGLFGVTQASQPGGLFGTATNTSTGTAFGTGTGLFGQTNTGFGAVGSTLFGNNK…	Kanamycin
pET28_12xHis-TEV-MIDI	12XHis-TEV	in vitro turbidity and imaging; bacterial expression	MGSSHHHHHHHHHHHHSSGQDLENLYFQGSGLFGSSPATSSATGLFSSSTTNSGFAYGQNKTAFGTSTTGFGTNPGGLFGQQNQQTTSLFSKPFGQATTTQNTGFSFGNTSTIGQPSTNTMGLFGVTQASQPGGLFGTATNTSTGTAFGTGTGLFGQTNTGFGAVGSTLFGNNKLTTFGSSTTSAPSFGTTSGGLFGFGTNTSGNSIFGSKPAPGTLGTGLGAGFGTALGAGQASLFGNNQPKIGGPLGTGAFGAPGFNTTTATLGFGAPQAPVVDREKQPSEGAFSENNAENESGGDKPPIDPNNPAANWLHARSTRKKRCPYTKHQTLELEKEFLFNMYLTRDRRYEVARLLNLTERQVKIWFQNRRMKMKKINKDRAKDE	Kanamycin
pET28_12xHis-TEV-MIDI-21FGAA	12XHis-TEV	in vitro turbidity and imaging; bacterial expression	MGSSHHHHHHHHHHHHSSGQDLENLYFQGSGLAASSPATSSATGLFSSSTTNSGFAYGQNKTAAATSTTGAATNPGGLAAQQNQQTTSLFSKPAAQATTTQNTGFSAANTSTIGQPSTNTMGLAAVTQASQPGGLAATATNTSTGTAAATGTGLAAQTNTGAAAVGSTLAANNKLTTAASSTTSAPSAATTSGGLAAAATNTSGNSIAASKPAPGTLGTGLGAGAATALGAGQASLAANNQPKIGGPLGTGAAAAPGFNTTTATLGAAAPQAPVVDREKQPSEGAFSENNAENESGGDKPPIDPNNPAANWLHARSTRKKRCPYTKHQTLELEKEFLFNMYLTRDRRYEVARLLNLTERQVKIWFQNRRMKMKKINKDRAKDE	Kanamycin
pET28_12xHis-TEV-NUP98	12XHis-TEV	in vitro turbidity and imaging; bacterial expression	MGSSHHHHHHHHHHHHSSGQDLENLYFQGSMFNKSFGTPFGGGTGGFGTTSTFGQNTGFGTTSGGAFGTSAFGSSNNTGGLFGNSQTKPGGLFGTSSFSQPATSTSTGFGFGTSTGTANTLFGTASTGTSLFSSQNNAFAQNKPTGFGNFGTSTSSGGLFGTTNTTSNPFGSTSGSLFGPSSFTAAPTGTTIKFNPPTGTDTMVKAGVSTNISTKHQCITAMKEYESKSLEELRLEDYQANRKGPQNQVGAGTTTGLFGSSPATSSATGLFSSSTTNSGFAYGQNKTAFGTSTTGFGTNPGGLFGQQNQQTTSLFSKPFGQATTTQNTGFSFGNTSTIGQPSTNTMGLFGVTQASQPGGLFGTATNTSTGTAFGTGTGLFGQTNTGFGAVGSTLFGNNK…	Kanamycin
pET28_12xHis-TEV-HOXA9 165-272	6XHis-TEV	in vitro turbidity; bacterial expression	MGSSHHHHHHSQDLENLYFQGSDREKQPSEGAFSENNAENESGGDKPPIDPNNPAANWLHARSTRKKRCPYTKHQTLELEKEFLFNMYLTRDRRYEVARLLNLTERQVKIWFQNRRMKMKKINKDRAKDE	Kanamycin
pET28_12xHis-TEV-HOXA9 197-272	6XHis-TEV	in vitro turbidity; bacterial expression	MGSSHHHHHHSQDLENLYFQGSAANWLHARSTRKKRCPYTKHQTLELEKEFLFNMYLTRDRRYEVARLLNLTERQVKIWFQNRRMKMKKINKDRAKDE	Kanamycin
CCLMPC-mEGFP-NUP98-HOXA9	mEGFP	mHSPC imaging, colony formation, RNAseq; lentiviral transduction	MVSKGEELFTGVVPILVELDGDVNGHKFSVSGEGEGDATYGKLTLKFICTTGKLPVPWPTLVTTLTYGVQCFSRYPDHMKQHDFFKSAMPEGYVQERTIFFKDDGNYKTRAEVKFEGDTLVNRIELKGIDFKEDGNILGHKLEYNYNSHNVYIMADKQKNGIKVNFKIRHNIEDGSVQLADHYQQNTPIGDGPVLLPDNHYLSTQSKLSKDPNEKRDHMVLLEFVTAAGITLGMDELYKGGSGGSGGSAAAMFNKSFGTPFGGGTGGFGTTSTFGQNTGFGTTSGGAFGTSAFGSSNNTGGLFGNSQTKPGGLFGTSSFSQPATSTSTGFGFGTSTGTANTLFGTASTGTSLFSSQNNAFAQNKPTGFGNFGTSTSSGGLFGTTNTTSNPFGSTSGSLF…	Ampicillin
CCLMPC-mEGFP-NUP98-HOXA9-8FA	mEGFP	mHSPC imaging, colony formation, RNAseq; lentiviral transduction	MVSKGEELFTGVVPILVELDGDVNGHKFSVSGEGEGDATYGKLTLKFICTTGKLPVPWPTLVTTLTYGVQCFSRYPDHMKQHDFFKSAMPEGYVQERTIFFKDDGNYKTRAEVKFEGDTLVNRIELKGIDFKEDGNILGHKLEYNYNSHNVYIMADKQKNGIKVNFKIRHNIEDGSVQLADHYQQNTPIGDGPVLLPDNHYLSTQSKLSKDPNEKRDHMVLLEFVTAAGITLGMDELYKGGSGGSGGSAAAMFNKSFGTPFGGGTGGFGTTSTFGQNTGFGTTSGGAFGTSAFGSSNNTGGLFGNSQTKPGGLFGTSSFSQPATSTSTGFGFGTSTGTANTLFGTASTGTSLFSSQNNAFAQNKPTGFGNFGTSTSSGGLFGTTNTTSNPFGSTSGSLF…	Ampicillin
CCLMPC_mEGFP-NUP98-HOXA9-21FGAA	mEGFP	mHSPC imaging, colony formation, RNAseq; lentiviral transduction	MVSKGEELFTGVVPILVELDGDVNGHKFSVSGEGEGDATYGKLTLKFICTTGKLPVPWPTLVTTLTYGVQCFSRYPDHMKQHDFFKSAMPEGYVQERTIFFKDDGNYKTRAEVKFEGDTLVNRIELKGIDFKEDGNILGHKLEYNYNSHNVYIMADKQKNGIKVNFKIRHNIEDGSVQLADHYQQNTPIGDGPVLLPDNHYLSTQSKLSKDPNEKRDHMVLLEFVTAAGITLGMDELYKGGSGGSGGSAAAMFNKSFGTPFGGGTGGFGTTSTFGQNTGFGTTSGGAFGTSAFGSSNNTGGLFGNSQTKPGGLFGTSSFSQPATSTSTGFGFGTSTGTANTLFGTASTGTSLFSSQNNAFAQNKPTGFGNFGTSTSSGGLFGTTNTTSNPFGSTSGSLF…	Ampicillin
CCLMPC_mEGFP-NUP98-HOXA9-∆DNA	mEGFP	mHSPC imaging, colony formation, RNAseq; lentiviral transduction	MVSKGEELFTGVVPILVELDGDVNGHKFSVSGEGEGDATYGKLTLKFICTTGKLPVPWPTLVTTLTYGVQCFSRYPDHMKQHDFFKSAMPEGYVQERTIFFKDDGNYKTRAEVKFEGDTLVNRIELKGIDFKEDGNILGHKLEYNYNSHNVYIMADKQKNGIKVNFKIRHNIEDGSVQLADHYQQNTPIGDGPVLLPDNHYLSTQSKLSKDPNEKRDHMVLLEFVTAAGITLGMDELYKGGSGGSGGSAAAMFNKSFGTPFGGGTGGFGTTSTFGQNTGFGTTSGGAFGTSAFGSSNNTGGLFGNSQTKPGGLFGTSSFSQPATSTSTGFGFGTSTGTANTLFGTASTGTSLFSSQNNAFAQNKPTGFGNFGTSTSSGGLFGTTNTTSNPFGSTSGSLF…	Ampicillin
CCLMPC_mEGFP-MIDI	mEGFP	mHSPC imaging, colony formation, RNAseq; lentiviral transduction	MVSKGEELFTGVVPILVELDGDVNGHKFSVSGEGEGDATYGKLTLKFICTTGKLPVPWPTLVTTLTYGVQCFSRYPDHMKQHDFFKSAMPEGYVQERTIFFKDDGNYKTRAEVKFEGDTLVNRIELKGIDFKEDGNILGHKLEYNYNSHNVYIMADKQKNGIKVNFKIRHNIEDGSVQLADHYQQNTPIGDGPVLLPDNHYLSTQSKLSKDPNEKRDHMVLLEFVTAAGITLGMDELYKGGSGGSGGSAAAGLFGSSPATSSATGLFSSSTTNSGFAYGQNKTAFGTSTTGFGTNPGGLFGQQNQQTTSLFSKPFGQATTTQNTGFSFGNTSTIGQPSTNTMGLFGVTQASQPGGLFGTATNTSTGTAFGTGTGLFGQTNTGFGAVGSTLFGNNKLTTF…	Ampicillin
CCLMPC_mEGFP-MIDI-8FA	mEGFP	mHSPC imaging, colony formation, RNAseq; lentiviral transduction	MVSKGEELFTGVVPILVELDGDVNGHKFSVSGEGEGDATYGKLTLKFICTTGKLPVPWPTLVTTLTYGVQCFSRYPDHMKQHDFFKSAMPEGYVQERTIFFKDDGNYKTRAEVKFEGDTLVNRIELKGIDFKEDGNILGHKLEYNYNSHNVYIMADKQKNGIKVNFKIRHNIEDGSVQLADHYQQNTPIGDGPVLLPDNHYLSTQSKLSKDPNEKRDHMVLLEFVTAAGITLGMDELYKGGSGGSGGSAAAGLAGSSPATSSATGLFSSSTTNSGFAYGQNKTAFGTSTTGFGTNPGGLAGQQNQQTTSLFSKPFGQATTTQNTGFSFGNTSTIGQPSTNTMGLAGVTQASQPGGLAGTATNTSTGTAFGTGTGLAGQTNTGFGAVGSTLFGNNKLTTF…	Ampicillin
CCLMPC_mEGFP-MIDI-21FGAA	mEGFP	mHSPC imaging, colony formation, RNAseq; lentiviral transduction	MVSKGEELFTGVVPILVELDGDVNGHKFSVSGEGEGDATYGKLTLKFICTTGKLPVPWPTLVTTLTYGVQCFSRYPDHMKQHDFFKSAMPEGYVQERTIFFKDDGNYKTRAEVKFEGDTLVNRIELKGIDFKEDGNILGHKLEYNYNSHNVYIMADKQKNGIKVNFKIRHNIEDGSVQLADHYQQNTPIGDGPVLLPDNHYLSTQSKLSKDPNEKRDHMVLLEFVTAAGITLGMDELYKGGSGGSGGSAAAGLAASSPATSSATGLFSSSTTNSGFAYGQNKTAAATSTTGAATNPGGLAAQQNQQTTSLFSKPAAQATTTQNTGFSAANTSTIGQPSTNTMGLAAVTQASQPGGLAATATNTSTGTAAATGTGLAAQTNTGAAAVGSTLAANNKLTTA…	Ampicillin
CCLMPC_CAT (Empty vector)	None	colony formation; RNAseq; lentiviral transduction	MEKKITGYTTVDISQWHRKEHFEAFQSVAQCTYNQTVQLDITAFLKTVKKNKHKFYPAFIHILARLMNAHPEFRMAMKDGELVIWDSVHPCYTVFHEQTETFSSLWSEYHDDFRQFLHIYSQDVACYGENLAYFPKGFIENMFFVSANPWVSFTSFDLNVANMDNFFAPVFTMGKYYTQGDKVLMPLAIQVHHAVCDGFHVGRMLNELQQYCDEWQGGAY-	Ampicillin
CCLMPG_CAT (Empty vector)	None	mHSPC imaging; lentiviral transduction	MEKKITGYTTVDISQWHRKEHFEAFQSVAQCTYNQTVQLDITAFLKTVKKNKHKFYPAFIHILARLMNAHPEFRMAMKDGELVIWDSVHPCYTVFHEQTETFSSLWSEYHDDFRQFLHIYSQDVACYGENLAYFPKGFIENMFFVSANPWVSFTSFDLNVANMDNFFAPVFTMGKYYTQGDKVLMPLAIQVHHAVCDGFHVGRMLNELQQYCDEWQGGAY-	Ampicillin
CCLMPC_mEGFP-NUP98-KDM5A	mEGFP	mHSPC imaging; lentiviral transduction	MFNKSFGTPFGGGTGGFGTTSTFGQNTGFGTTSGGAFGTSAFGSSNNTGGLFGNSQTKPGGLFGTSSFSQPATSTSTGFGFGTSTGTANTLFGTASTGTSLFSSQNNAFAQNKPTGFGNFGTSTSSGGLFGTTNTTSNPFGSTSGSLFGPSSFTAAPTGTTIKFNPPTGTDTMVKAGVSTNISTKHQCITAMKEYESKSLEELRLEDYQANRKGPQNQVGAGTTTGLFGSSPATSSATGLFSSSTTNSGFAYGQNKTAFGTSTTGFGTNPGGLFGQQNQQTTSLFSKPFGQATTTQNTGFSFGNTSTIGQPSTNTMGLFGVTQASQPGGLFGTATNTSTGTAFGTGTGLFGQTNTGFGAVGSTLFGNNKLTTFGSSTTSAPSFGTTSGGLFGFGTNTSG…	Ampicillin
CCLMPC_mEGFP-NUP98-LNP1	mEGFP	mHSPC imaging; lentiviral transduction	MFNKSFGTPFGGGTGGFGTTSTFGQNTGFGTTSGGAFGTSAFGSSNNTGGLFGNSQTKPGGLFGTSSFSQPATSTSTGFGFGTSTGTANTLFGTASTGTSLFSSQNNAFAQNKPTGFGNFGTSTSSGGLFGTTNTTSNPFGSTSGSLFGPSSFTAAPTGTTIKFNPPTGTDTMVKAGVSTNISTKHQCITAMKEYESKSLEELRLEDYQANRKGPQNQVGAGTTTGLFGSSPATSSATGLFSSSTTNSGFAYGQNKTAFGTSTTGFGTNPGGLFGQQNQQTTSLFSKPFGQATTTQNTGFSFGNTSTIGQPSTNTMGLFGVTQASQPGGLFGTATNTSTGTAFGTGTGLFGQTNTGFGAVGSTLFGNNKLTTFGSSTTSAPSFGTTSGGLFGFGTNTSG…	Ampicillin
CCLMPC_mEGFP-NUP98-PRRX1	mEGFP	mHSPC imaging; lentiviral transduction	MFNKSFGTPFGGGTGGFGTTSTFGQNTGFGTTSGGAFGTSAFGSSNNTGGLFGNSQTKPGGLFGTSSFSQPATSTSTGFGFGTSTGTANTLFGTASTGTSLFSSQNNAFAQNKPTGFGNFGTSTSSGGLFGTTNTTSNPFGSTSGSLFGPSSFTAAPTGTTIKFNPPTGTDTMVKAGVSTNISTKHQCITAMKEYESKSLEELRLEDYQANRKGPQNQVGAGTTTGLFGSSPATSSATGLFSSSTTNSGFAYGTTGFGTNPGGLFGQQNQQTTSLFSKPFGQATTTQNTGFSFGNTSTIGQPSTNTMGLFGVTQASQPGGLFGTATNTSTGTAFGTGTGLFGQTNTGFGAVGSTLFGNNKLTTFGSSTTSAPSFGTTNGGLFGFGTNTSGNSIFGSKPA…	Ampicillin
MSCV_NUP98-KDM5A_ires_GFP	None	colony formation; retroviral transduction	MFNKSFGTPFGGGTGGFGTTSTFGQNTGFGTTSGGAFGTSAFGSSNNTGGLFGNSQTKPGGLFGTSSFSQPATSTSTGFGFGTSTGTANTLFGTASTGTSLFSSQNNAFAQNKPTGFGNFGTSTSSGGLFGTTNTTSNPFGSTSGSLFGPSSFTAAPTGTTIKFNPPTGTDTMVKAGVSTNISTKHQCITAMKEYESKSLEELRLEDYQANRKGPQNQVGAGTTTGLFGSSPATSSATGLFSSSTTNSGFAYGQNKTAFGTSTTGFGTNPGGLFGQQNQQTTSLFSKPFGQATTTQNTGFSFGNTSTIGQPSTNTMGLFGVTQASQPGGLFGTATNTSTGTAFGTGTGLFGQTNTGFGAVGSTLFGNNKLTTFGSSTTSAPSFGTTSGGLFGFGTNTSG…	Ampicillin
MSCV_NUP98-LNP1_ires_GFP	None	colony formation; retroviral transduction	MFNKSFGTPFGGGTGGFGTTSTFGQNTGFGTTSGGAFGTSAFGSSNNTGGLFGNSQTKPGGLFGTSSFSQPATSTSTGFGFGTSTGTANTLFGTASTGTSLFSSQNNAFAQNKPTGFGNFGTSTSSGGLFGTTNTTSNPFGSTSGSLFGPSSFTAAPTGTTIKFNPPTGTDTMVKAGVSTNISTKHQCITAMKEYESKSLEELRLEDYQANRKGPQNQVGAGTTTGLFGSSPATSSATGLFSSSTTNSGFAYGQNKTAFGTSTTGFGTNPGGLFGQQNQQTTSLFSKPFGQATTTQNTGFSFGNTSTIGQPSTNTMGLFGVTQASQPGGLFGTATNTSTGTAFGTGTGLFGQTNTGFGAVGSTLFGNNKLTTFGSSTTSAPSFGTTSGGLFGFGTNTSG…	Ampicillin
MSCV_NUP98-PMX1_ires_GFP	None	colony formation; retroviral transduction	MFNKSFGTPFGGGTGGFGTTSTFGQNTGFGTTSGGAFGTSAFGSSNNTGGLFGNSQTKPGGLFGTSSFSQPATSTSTGFGFGTSTGTANTLFGTASTGTSLFSSQNNAFAQNKPTGFGNFGTSTSSGGLFGTTNTTSNPFGSTSGSLFGPSSFTAAPTGTTIKFNPPTGTDTMVKAGVSTNISTKHQCITAMKEYESKSLEELRLEDYQANRKGPQNQVGAGTTTGLFGSSPATSSATGLFSSSTTNSGFAYGTTGFGTNPGGLFGQQNQQTTSLFSKPFGQATTTQNTGFSFGNTSTIGQPSTNTMGLFGVTQASQPGGLFGTATNTSTGTAFGTGTGLFGQTNTGFGAVGSTLFGNNKLTTFGSSTTSAPSFGTTNGGLFGFGTNTSGNSIFGSKPA…	Ampicillin
MSCV_ires_GFP (Empty vector)	None	colony formation; retroviral transduction	N/A	Ampicillin
CAG-ECO	None	production of retrovirus in HEK293T; transient transfection	N/A	Ampicillin
gag pol	None	production of retrovirus in HEK293T; transient transfection	N/A	Ampicillin
